# Supplementary material
Source: Springer Nature journal article supplement (https://www.springermedizin.de/resource/supplementary/12880_2013_222_MOESM1_ESM.pdf/9450272)
Supplement: MOESM1 [file 9450272]

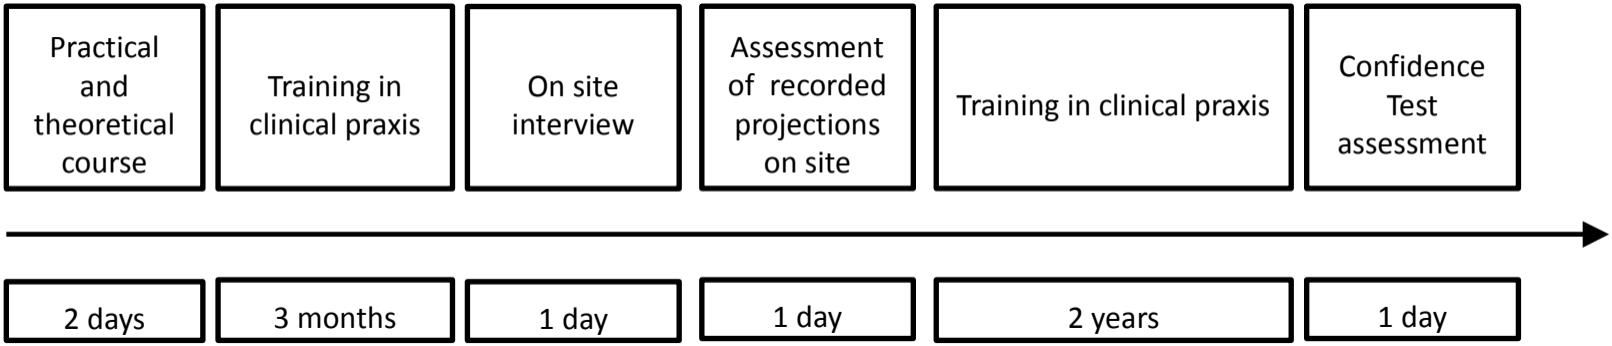

Practical  
and  
theoretical  
course

Training in  
clinical praxis

On site  
interview

Assessment  
of recorded  
projections  
on site

Training in clinical praxis

Confidence  
Test  
assessment

2 days

3 months

1 day

1 day

2 years

1 day
